# Supplementary material
Source: PubMed Central journal article supplement (PMC3834756)
Supplement: bph0170-0317-SD1.pdf [file bph0170-0317-SD1.pdf]

## Supplemental data

### Suppl. Fig. 1

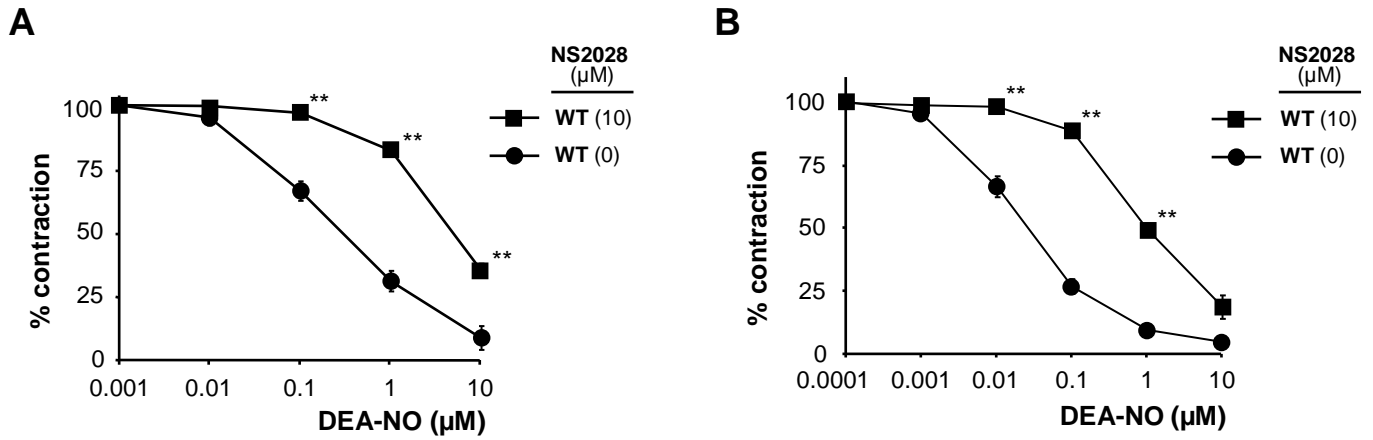

NS2028 inhibition of NO-stimulated NO-GC.

**A)** DEA-NO-induced relaxation of fundus strips from WT in the absence and presence of 10  $\mu\text{M}$  NS2028 (\*\*  $p=0.0079$ ). **B)** DEA-NO-induced relaxation of aortic rings from WT in the absence and presence of 10  $\mu\text{M}$  NS2028 (\*\*  $p=0.0079$ ). Data shown are mean  $\pm$  SEM of  $n=5$  animals.
